# Supplementary material for: A Diagnostic Gene-Expression Signature in Fibroblasts of Amyotrophic Lateral Sclerosis
Source: MDPI journal article supplement (doi:10.3390/cells12141884), 2023-07-18
Supplement: s1 [file s1]

**Supplementary Figure S1.** Heatmaps showing the overlap between expression levels (fold change ratio) of DEGs detected in our sALS fibroblast cohort with other gene expression studies in sALS fibroblasts. Down-regulation is coloured in shades of green, while up-regulation is coloured in shades of red.

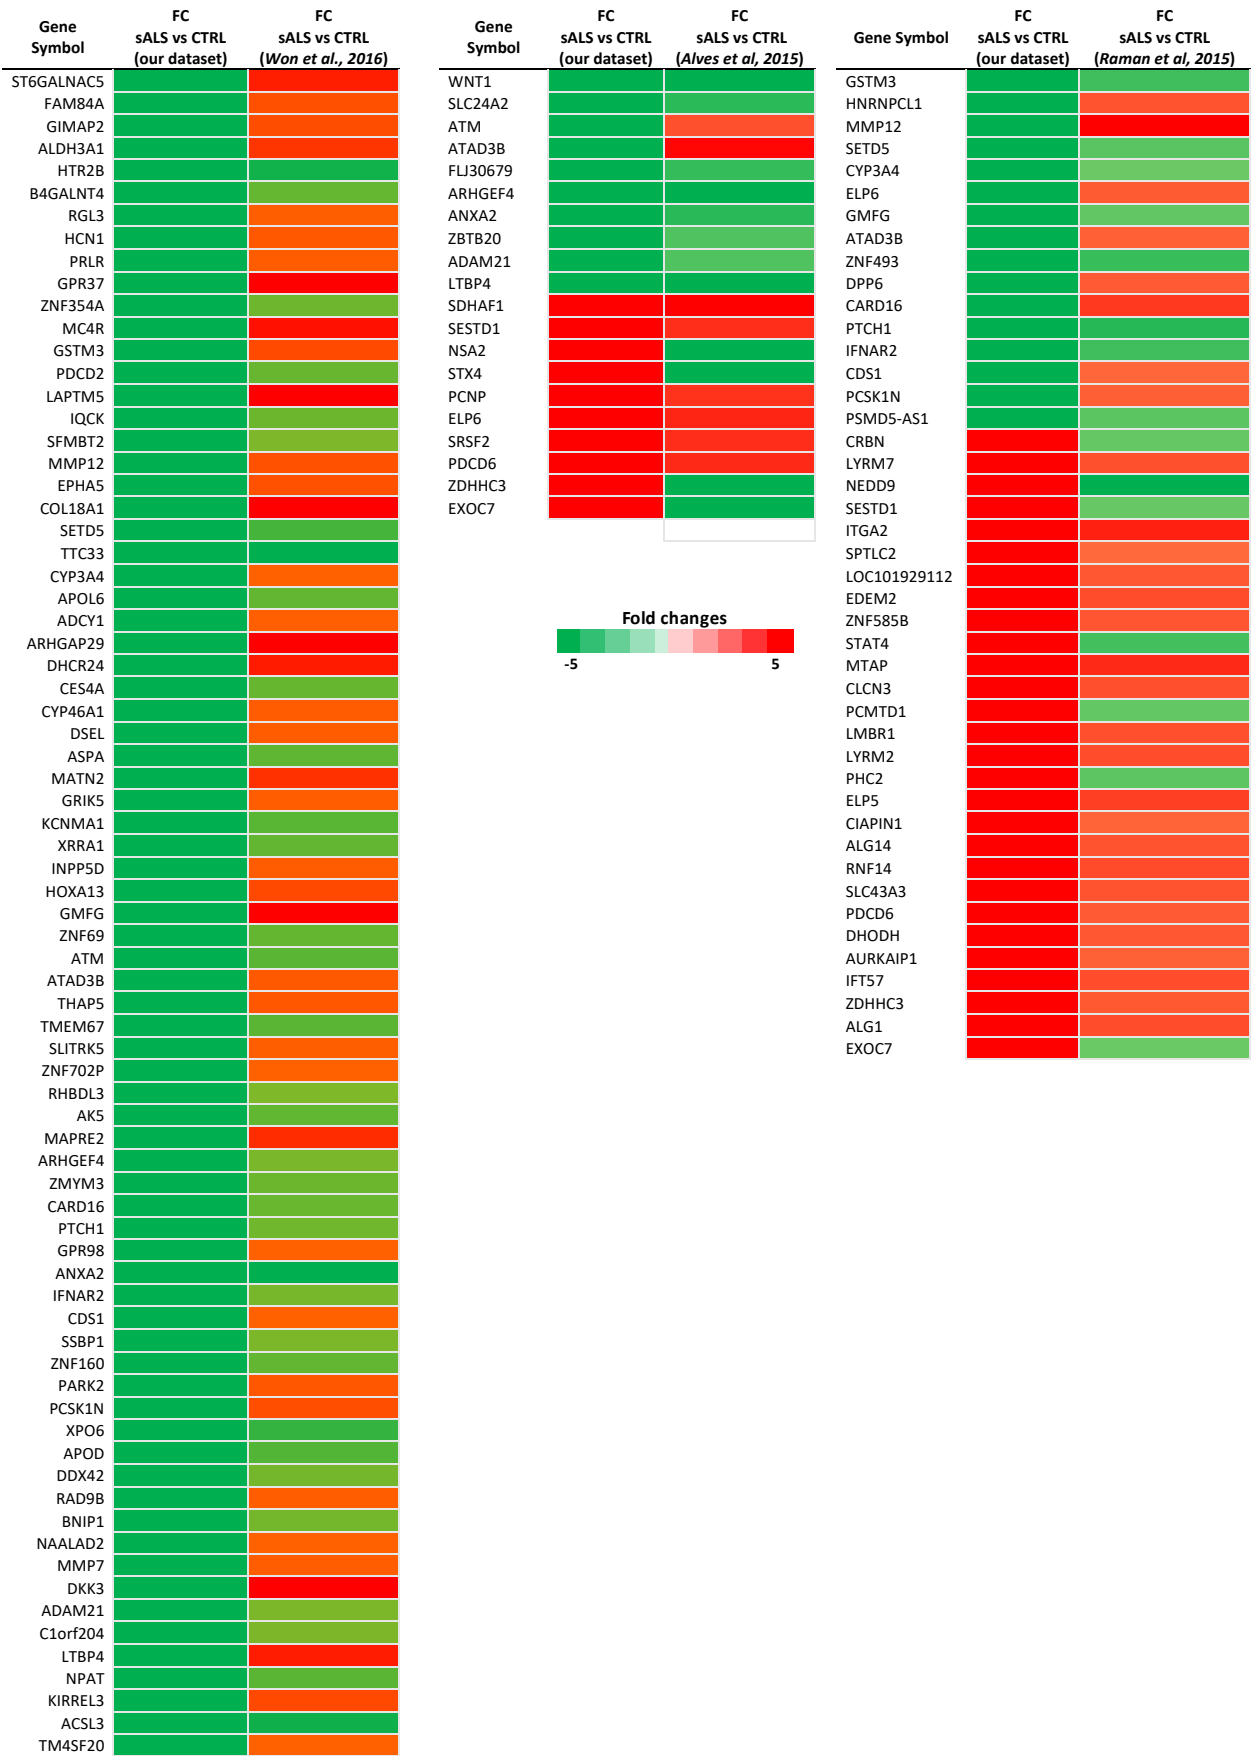

|           |  |  |
|-----------|--|--|
| SPTA1     |  |  |
| SCNM1     |  |  |
| EIF4G3    |  |  |
| ST3GAL4   |  |  |
| CRBN      |  |  |
| MRPL43    |  |  |
| SDHAF1    |  |  |
| TMEM220   |  |  |
| CNN1      |  |  |
| GSTO2     |  |  |
| TSPAN2    |  |  |
| MTRF1L    |  |  |
| KIAA1462  |  |  |
| LYRM7     |  |  |
| ZNF641    |  |  |
| FRMD4A    |  |  |
| TAF13     |  |  |
| PHYH      |  |  |
| NCOA3     |  |  |
| GAL3ST4   |  |  |
| RARG      |  |  |
| TTC5      |  |  |
| SEL1L3    |  |  |
| RABEP1    |  |  |
| CNNM4     |  |  |
| BANK1     |  |  |
| POFUT2    |  |  |
| FGFBP3    |  |  |
| ACVR2A    |  |  |
| TBC1D24   |  |  |
| YIF1B     |  |  |
| GDF6      |  |  |
| NEDD9     |  |  |
| OBFC1     |  |  |
| PABPC4L   |  |  |
| SESTD1    |  |  |
| LRRC8A    |  |  |
| SLC38A7   |  |  |
| GPX7      |  |  |
| C17orf85  |  |  |
| ITGA2     |  |  |
| DNAJC21   |  |  |
| HNRNPR    |  |  |
| ACTR8     |  |  |
| FZR1      |  |  |
| MTRF1     |  |  |
| ZMYND11   |  |  |
| SPTLC2    |  |  |
| TANC2     |  |  |
| CHPF2     |  |  |
| MAPK13    |  |  |
| KCNK6     |  |  |
| EDEM2     |  |  |
| MGAT2     |  |  |
| ZNF585B   |  |  |
| TAF1      |  |  |
| POMC      |  |  |
| PPAN      |  |  |
| USP6NL    |  |  |
| DYNLL2    |  |  |
| SLC30A9   |  |  |
| SF3B3     |  |  |
| STAT4     |  |  |
| RNF13     |  |  |
| NSA2      |  |  |
| FGD6      |  |  |
| LMO7      |  |  |
| FAM65A    |  |  |
| ALAD      |  |  |
| MRPL45    |  |  |
| ZBTB3     |  |  |
| LRRC23    |  |  |
| STX4      |  |  |
| MTAP      |  |  |
| ERLIN2    |  |  |
| C18orf8   |  |  |
| CLCN3     |  |  |
| SOCS5     |  |  |
| GNG10     |  |  |
| ALKBH7    |  |  |
| GOLGB1    |  |  |
| TMEM185B  |  |  |
| HIST1H2AM |  |  |
| LOC728323 |  |  |
| PEX3      |  |  |
| CELF1     |  |  |
| PTPRJ     |  |  |
| TSG101    |  |  |
| ATL1      |  |  |
| DAP       |  |  |

|          |  |  |
|----------|--|--|
| PCMTD1   |  |  |
| OXCT1    |  |  |
| TCF25    |  |  |
| LMBR1    |  |  |
| LYRM2    |  |  |
| MADD     |  |  |
| PCNP     |  |  |
| PHC2     |  |  |
| LRRC8E   |  |  |
| UACA     |  |  |
| LRPPRC   |  |  |
| CIAPIN1  |  |  |
| FAM120C  |  |  |
| ZNF577   |  |  |
| FEZ1     |  |  |
| ALG14    |  |  |
| RNF14    |  |  |
| FBXO32   |  |  |
| AIG1     |  |  |
| FOSL2    |  |  |
| COL11A1  |  |  |
| HOXC9    |  |  |
| DYNC2H1  |  |  |
| CGGBP1   |  |  |
| TTC27    |  |  |
| SLC43A3  |  |  |
| BBS10    |  |  |
| SRSF2    |  |  |
| PDCD6    |  |  |
| ZFAND2B  |  |  |
| HMGA1    |  |  |
| KLHL21   |  |  |
| DHODH    |  |  |
| POLR3D   |  |  |
| ZC3H7A   |  |  |
| RAB34    |  |  |
| MAGED2   |  |  |
| DOCK7    |  |  |
| CTBP2    |  |  |
| AURKAIP1 |  |  |
| AXL      |  |  |
| EPAS1    |  |  |
| IFT57    |  |  |
| ZDHHC3   |  |  |
| WDR54    |  |  |
| SEC31A   |  |  |
| ALG1     |  |  |
| CARHSP1  |  |  |
| EXOC7    |  |  |
